# Supplementary material
Source: MDPI journal article supplement (https://www.mdpi.com/2624-5175/5/4/39)
Supplement: s1 [file s1]

## **SUPPLEMENTARY MATERIAL**

### **On the efficacy of a CBT-I-based online program for sleep problems: a randomized controlled trial**

Esther-Sevil Eigl<sup>1</sup>, Theresa Hauser<sup>1</sup>, Pavlos I. Topalidis<sup>1</sup> & Manuel Schabus<sup>1,2</sup>

<sup>1</sup>Laboratory for Sleep, Cognition & Consciousness Research, Paris-Lodron University of Salzburg, Austria

<sup>2</sup>Centre for Cognitive Neuroscience Salzburg (CCNS), Paris-Lodron University of Salzburg, Austria

Corresponding Author:

Manuel Schabus,  
Hellbrunnerstr. 34  
A-5020 Salzburg, Austria  
[manuel.schabus@plus.ac.at](mailto:manuel.schabus@plus.ac.at)

**Table S1.** Demographic characteristics of participants.

| Response Option                 | Total    |      | EG       |      | CG       |       |
|---------------------------------|----------|------|----------|------|----------|-------|
|                                 | <i>n</i> | %    | <i>n</i> | %    | <i>n</i> | %     |
| <b>Sex</b>                      |          |      |          |      |          |       |
| Male                            | 26       | 49.1 | 13       | 48.1 | 13       | 50.0  |
| Female                          | 27       | 50.9 | 14       | 51.9 | 13       | 50.0  |
| <b>Educational level</b>        |          |      |          |      |          |       |
| University degree               | 26       | 49.1 | 9        | 33.3 | 17       | 65.4  |
| High school                     | 10       | 18.9 | 7        | 25.9 | 3        | 11.5. |
| Secondary school                | 2        | 3.8  | 2        | 7.4  |          |       |
| Educational training            | 6        | 11.3 | 3        | 11.1 | 3        | 11.5  |
| Vocational high school          | 7        | 13.2 | 6        | 22.2 | 1        | 3.8   |
| Higher general-education school | 2        | 3.8  |          |      | 2        | 7.7   |
| <b>Marital status</b>           |          |      |          |      |          |       |
| Married                         | 28       | 52.8 | 14       | 51.9 | 14       | 53.8  |
| Partnership                     | 11       | 20.8 | 6        | 22.2 | 5        | 19.2  |
| Single                          | 10       | 18.9 | 5        | 18.5 | 5        | 19.2  |
| Divorced                        | 3        | 1.9  | 2        | 7.4  | 1        | 3.8   |
| Widowed                         | 1        | 1.9  |          |      | 1        | 3.8   |

**Note.**  $N_{Total} = 53$ , Experimental Group = EG;  $n = 27$ , Control Group = CG;  $n = 26$ ; grey boxes: response option was not chosen in this group.

**Table S2.** Overview of the number (*n*) and percentage (%) of participants exceeding the cut-off-scores of the Pittsburgh Sleep Quality Index (PSQI; >5 poor sleep quality, >10 chronic sleep disorder) and the Insomnia Severity Index (ISI; >7 subthreshold insomnia, >14 moderate severe clinical insomnia) for all measurement time points (T0-T3).

| Outcome variable | Total    |      |          |      | EG       |      |          |      | CG       |      |          |      |
|------------------|----------|------|----------|------|----------|------|----------|------|----------|------|----------|------|
|                  | >5       |      | >10      |      | >5       |      | >10      |      | >5       |      | >10      |      |
|                  | <i>n</i> | %    |
| PSQI             |          |      |          |      |          |      |          |      |          |      |          |      |
| T0               | 44       | 83   | 18       | 34   | 46       | 74.1 | 7        | 25.9 | 24       | 92.3 | 11       | 42.3 |
| T1               | 34       | 64.2 | 8        | 15.1 | 15       | 55.6 | 3        | 11.1 | 19       | 73.1 | 5        | 19.2 |
| T2               | 29       | 54.7 | 6        | 11.3 | 11       | 40.7 | 2        | 7.4  | 18       | 69.2 | 4        | 15.4 |
| T3               | 23       | 44.2 | 3        | 5.8  | 8        | 29.6 |          |      | 15       | 60.0 | 3        | 12   |
|                  |          |      |          |      |          |      |          |      |          |      |          |      |
| ISI              | >7       |      | >14      |      | >7       |      | >14      |      | >7       |      | >14      |      |
|                  | <i>n</i> | %    |
|                  |          |      |          |      |          |      |          |      |          |      |          |      |
| T0               | 47       | 88.7 | 22       | 41.5 | 23       | 85.2 | 12       | 44.4 | 24       | 92.3 | 10       | 38.5 |
| T1               | 36       | 67.9 | 18       | 34   | 18       | 66.7 | 8        | 29.6 | 18       | 69.2 | 10       | 38.5 |
| T2               | 36       | 67.9 | 6        | 11.3 | 17       | 63   | 2        | 7.4  | 19       | 73.1 | 4        | 15.4 |
| T3               | 24       | 46.2 | 5        | 9.6  | 8        | 29.6 | 2        | 7.4  | 16       | 64   | 3        | 12   |

**Note.**  $N_{Total} = 53$ , Experimental Group = EG;  $n = 27$ , Control Group = CG;  $n = 26$ . *Italic values* correspond to the respective  $n_{Group} = -1$ , as of a missing value at T3 (i.e.,  $N_{Total} = 52$ ,  $n_{CG} = 25$ ). *Grey boxes*: response option was not chosen in this group.

**Table S3.** Mean (*M*), median (*Mdn*) and standard deviation (*SD*) for all measurement time points (T0-T3) regarding the (subjective) outcome measures of insomnia symptom severity assessed using the Insomnia Severity Index (ISI) and subjective sleep quality assessed using the Pittsburgh Sleep Quality Index (PSQI) in the experimental group (EG) in comparison to the control group (CG).

| Outcome variable | EG       |            |           | CG       |            |           |
|------------------|----------|------------|-----------|----------|------------|-----------|
|                  | <i>M</i> | <i>Mdn</i> | <i>SD</i> | <i>M</i> | <i>Mdn</i> | <i>SD</i> |
| ISI T0           | 13.19    | 14.00      | 4.93      | 12.96    | 12.00      | 4.88      |
| ISI T1           | 11.07    | 12.00      | 5.37      | 11.92    | 12.00      | 5.50      |

|         |      |      |      |      |       |      |
|---------|------|------|------|------|-------|------|
| ISI T2  | 8.44 | 9.00 | 4.47 | 9.60 | 9.00  | 4.77 |
| ISI T3  | 6.74 | 7.00 | 4.26 | 9.44 | 10.00 | 5.06 |
| PSQI T0 | 8.22 | 8.00 | 3.51 | 9.88 | 9.00  | 3.64 |
| PSQI T1 | 6.48 | 6.00 | 2.94 | 7.56 | 7.00  | 3.54 |
| PSQI T2 | 5.37 | 5.00 | 2.98 | 6.76 | 6.00  | 3.11 |
| PSQI T3 | 4.52 | 4.00 | 2.49 | 6.72 | 6.00  | 3.43 |

**Note.** Experimental Group = EG;  $n = 27$ , Control Group = CG;  $n = 25$ . Baseline (T0), Pre-intervention (T1), Post-intervention (T2), Follow-up (T3).

**Table S4.** Mean ( $M$ ), median ( $Mdn$ ) and standard deviation ( $SD$ ) for all measurement time points (T0-T3) regarding the objective outcome measures of wake after sleep onset (minutes) and sleep efficiency (%) assessed using ambulatory polysomnography in the experimental group (EG) in comparison to the control group (CG).

| Outcome variable | EG    |       |       | CG    |       |       |
|------------------|-------|-------|-------|-------|-------|-------|
|                  | $M$   | $Mdn$ | $SD$  | $M$   | $Mdn$ | $SD$  |
| WASO T0          | 64.60 | 42.00 | 43.18 | 41.22 | 39.50 | 16.54 |
| WASO T1          | 58.59 | 42.00 | 42.98 | 48.41 | 36.00 | 37.03 |
| WASO T2          | 42.50 | 38.30 | 23.47 | 45.72 | 37.00 | 33.12 |
| SE T0            | 84.32 | 88.60 | 8.46  | 88.00 | 89.10 | 4.53  |
| SE T1            | 86.00 | 89.20 | 8.61  | 87.50 | 89.20 | 7.10  |
| SE T2            | 89.18 | 90.40 | 5.17  | 86.82 | 88.90 | 7.65  |

**Note.** Experimental Group = EG;  $n = 27$ , Control Group = CG; Baseline (T0), Pre-intervention (T1), Post-intervention (T2), Follow-up (T3).

**Table S5.** Differences between the groups in all outcome variables at measurement time point T1 (Pre-Intervention).

| Outcome variable (T1) | EG       |            |           | CG       |            |           | <i>Z-/T-value</i> | <i>p-value</i> |
|-----------------------|----------|------------|-----------|----------|------------|-----------|-------------------|----------------|
|                       | <i>M</i> | <i>Mdn</i> | <i>SD</i> | <i>M</i> | <i>Mdn</i> | <i>SD</i> |                   |                |
| ISI                   | 11.07    | 12.00      | 5.37      | 11.92    | 12.00      | 5.50      | <i>-.560</i>      | .575           |
| PSQI                  | 6.48     | 6.00       | 2.94      | 7.56     | 7.00       | 3.54      | <i>-1.078</i>     | .281           |
| WASO                  | 58.59    | 42.00      | 42.98     | 48.41    | 36.00      | 37.03     | .911              | .367           |
| SE                    | 86.00    | 89.20      | 8.61      | 87.50    | 89.20      | 7.10      | <i>-.684</i>      | .497           |

**Note.** Mean (*M*), median (*Mdn*), standard deviation (*SD*). ISI = Insomnia Severity Index, PSQI = Pittsburgh Sleep Quality Index, WASO = Wake After Sleep Onset, SE = Sleep efficiency. T1 = Pre-Intervention. Experimental Group = EG; *n* = 27, Control Group = CG; *n* = 25. *Italic values* correspond to non-parametric *Z*-values.
